# Supplementary material for: 3-[Bis(pyridin-2-ylmethyl)amino]-5-(4-carboxyphenyl)-BODIPY as Ratiometric Fluorescent Sensor for Cu2+
Source: MDPI journal article supplement (doi:10.3390/ma11050814), 2018-05-16
Supplement: s1 [file s1]

Supplementary Materials

## 3-[Bis(pyridin-2-ylmethyl)amino]-5-(4-carboxyphenyl)-BODIPY as Ratiometric Fluorescent Sensor for Cu<sup>2+</sup>

Akira Hafuka <sup>1,\*</sup>, Hisashi Satoh <sup>2</sup>, Koji Yamada <sup>3</sup>, Masahiro Takahashi <sup>2</sup> and Satoshi Okabe <sup>2</sup>

<sup>1</sup> Department of Integrated Science and Engineering for Sustainable Society, Faculty of Science and Engineering, Chuo University, 1-13-27 Kasuga, Bunkyo-ku, Tokyo 112-8551, Japan

<sup>2</sup> Division of Environmental Engineering, Faculty of Engineering, Hokkaido University, North-13, West-8, Sapporo 060-8628, Japan; qsatoh@eng.hokudai.ac.jp (H.S.); m-takaha@eng.hokudai.ac.jp (M.T.); sokabe@eng.hokudai.ac.jp (S.O.)

<sup>3</sup> Division of Environmental Materials Science, Graduate School of Environmental Science, Hokkaido University, North-10, West-5, Sapporo 060-0810, Japan; yamada@ees.hokudai.ac.jp

\* Correspondence: hafuka.14p@g.chuo-u.ac.jp; Tel.: +81-3-3817-7283

Received: 8 April 2018 Accepted: 14 May 2018; Published: date

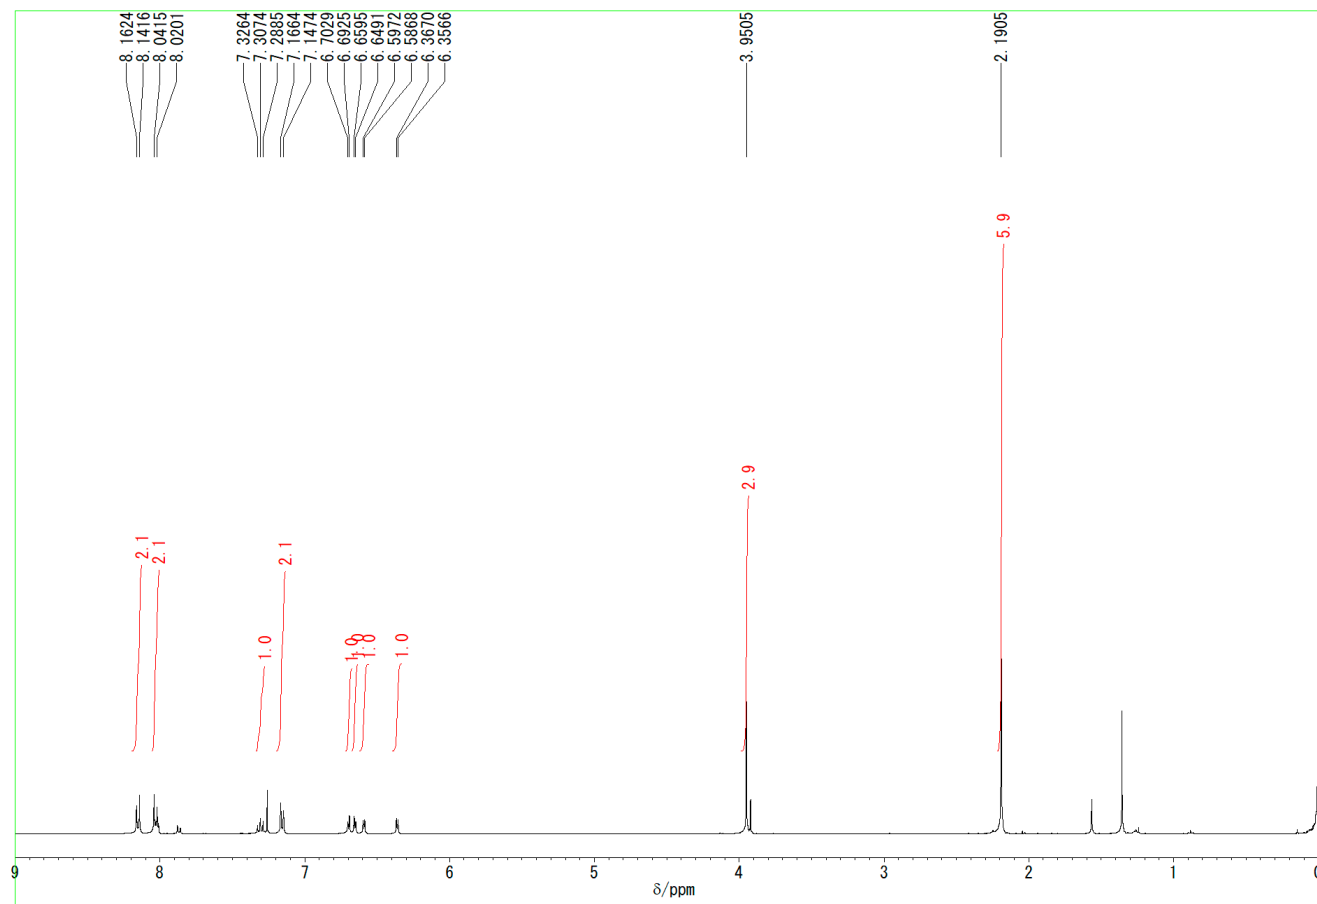

Figure S1.  $^1\text{H}$  NMR spectrum of compound 3.

130788\_53\_pn #11-13 RT: 0.17-0.20 AV: 2 NL: 3.55E6  
T: FTMS {1,1} + p ESI Full ms [150.00-2000.00]

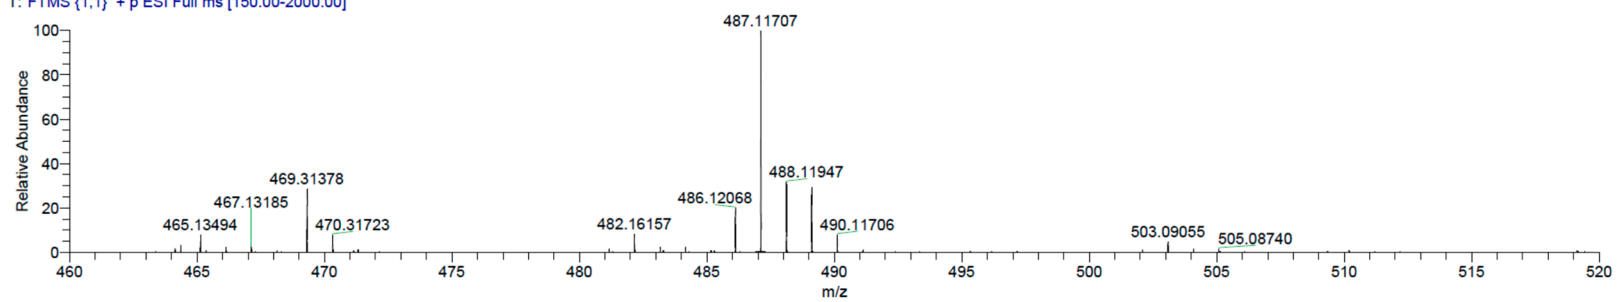

Figure S2. HRMS spectrum of compound 3.

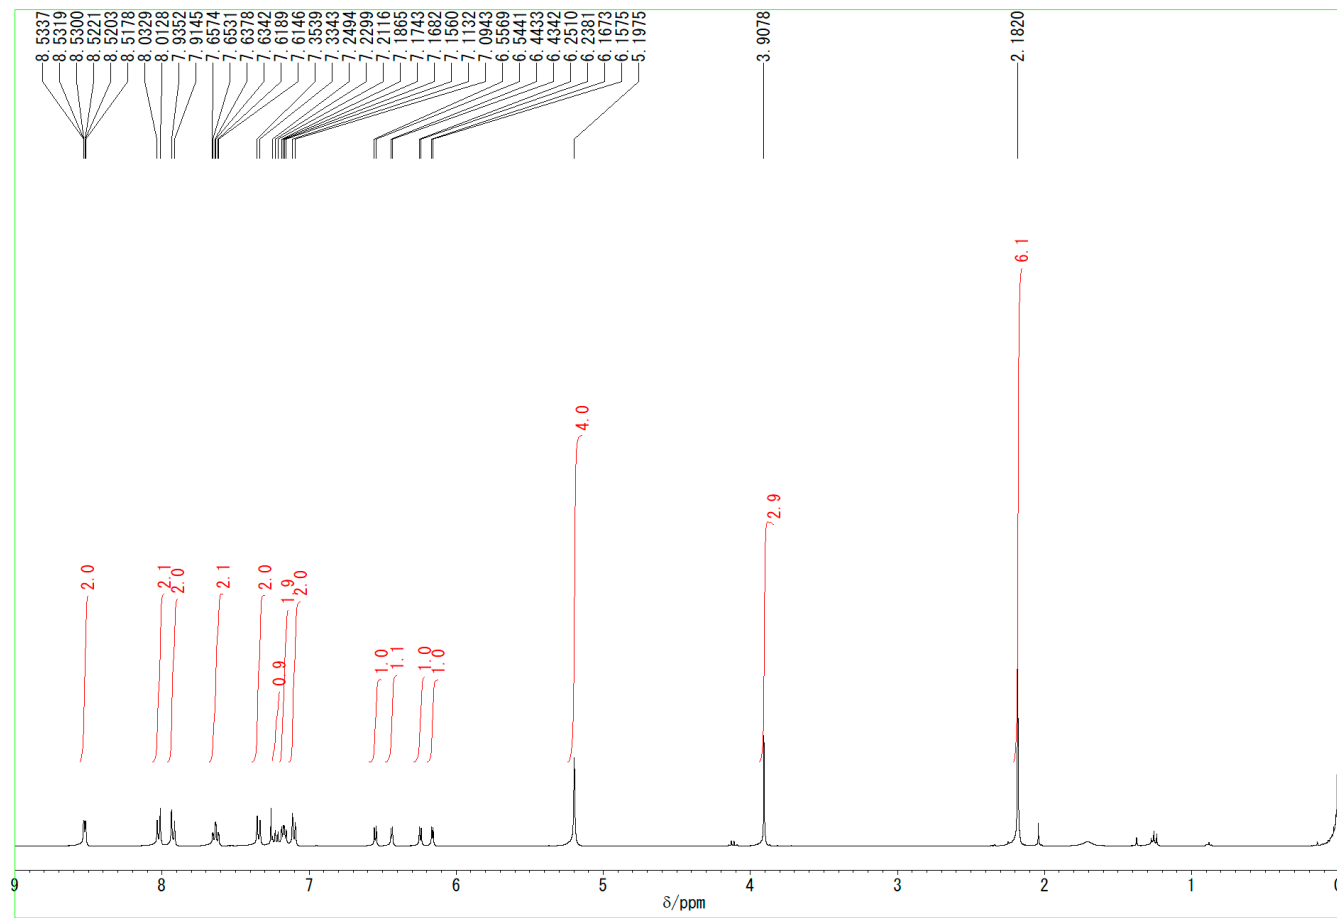

Figure S3.  $^1\text{H}$  NMR spectrum of compound 2.

130875\_58\_pn1 #12 RT: 0.19 AV: 1 NL: 2.31E7  
T: FTMS {1,1} + p ESI Full ms [150.00-2000.00]

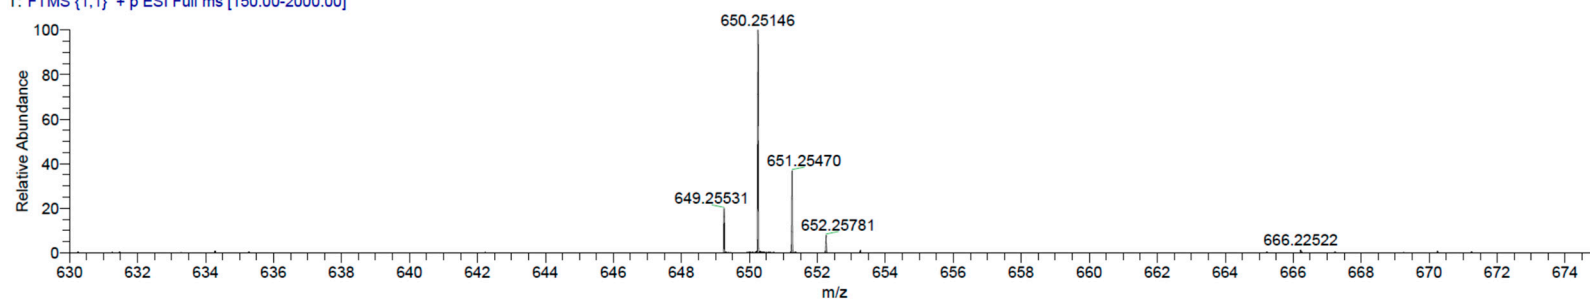

Figure S4. HRMS spectrum of compound 2.

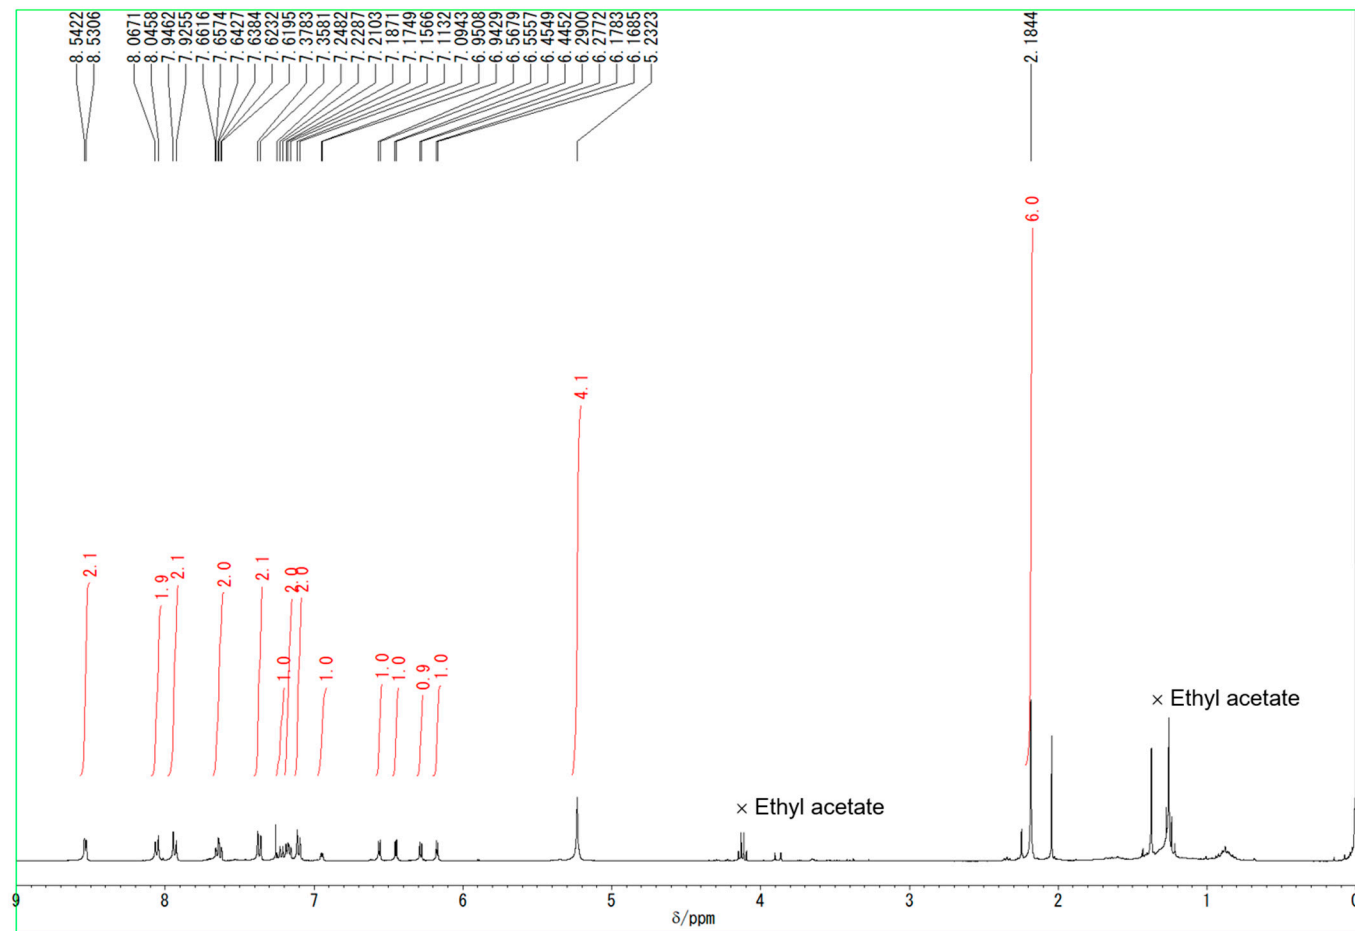

Figure S5.  $^1\text{H}$  NMR spectrum of BODIPY 1.

131045\_66\_pn3 #14 RT: 0.22 AV: 1 NL: 1.14E7  
T: FTMS {1,1} + p ESI Full ms [150.00-2000.00]

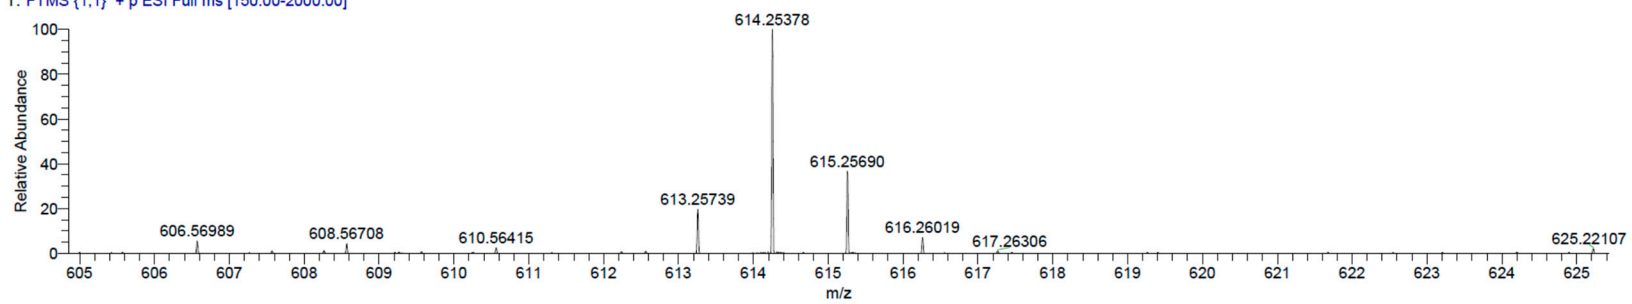

**Figure S6.** HRMS spectrum of BODIPY 1.
